# Supplementary material for: Validation of a Core Patient-Reported Outcome Measure for Life Participation in Kidney Transplant Recipients: the SONG Life Participation Instrument
Source: PubMed Central journal article supplement — Kidney Int Rep. 2023 Nov 3;9(1):87–95. doi: 10.1016/j.ekir.2023.10.018 (PMC10831350; doi:10.1016/j.ekir.2023.10.018), 2023-11-03

## **Supplementary Files**

Supplementary Table 1. Data completeness and targeting

Supplementary Figure 1. Frequency of SONG Life Participation items scale responses

Supplementary Figure 2. Frequency of EQ5D-5L 'usual activities' items scale responses.

**Supplementary Table 1. Data completeness and targeting**

| <b>Scale</b>                               | <b>Data completeness</b><br>– Computable<br>scale score<br>(%) | <b>Targeting</b>                    |                                 |                       |           |                                  |                 |
|--------------------------------------------|----------------------------------------------------------------|-------------------------------------|---------------------------------|-----------------------|-----------|----------------------------------|-----------------|
|                                            |                                                                | <b>Possible<br/>score<br/>range</b> | <b>Observed<br/>score range</b> | <b>Mean<br/>score</b> | <b>SD</b> | <b>Floor/Ceiling<br/>effect*</b> | <b>Skewness</b> |
| SONG Life<br>Participation<br>time point 1 | 249 (100)                                                      | 0 – 4                               | 0 – 4                           | 3.07                  | 0.91      | 0.01/33.7                        | -0.75           |
| SONG Life<br>Participation<br>time point 2 | 231 (92.8)                                                     | 0 – 4                               | 0 – 4                           | 2.94                  | 0.96      | 0.004/26.8                       | -0.61           |

**Supplementary Figure 1. Frequency of SONG Life Participation items scale responses.**

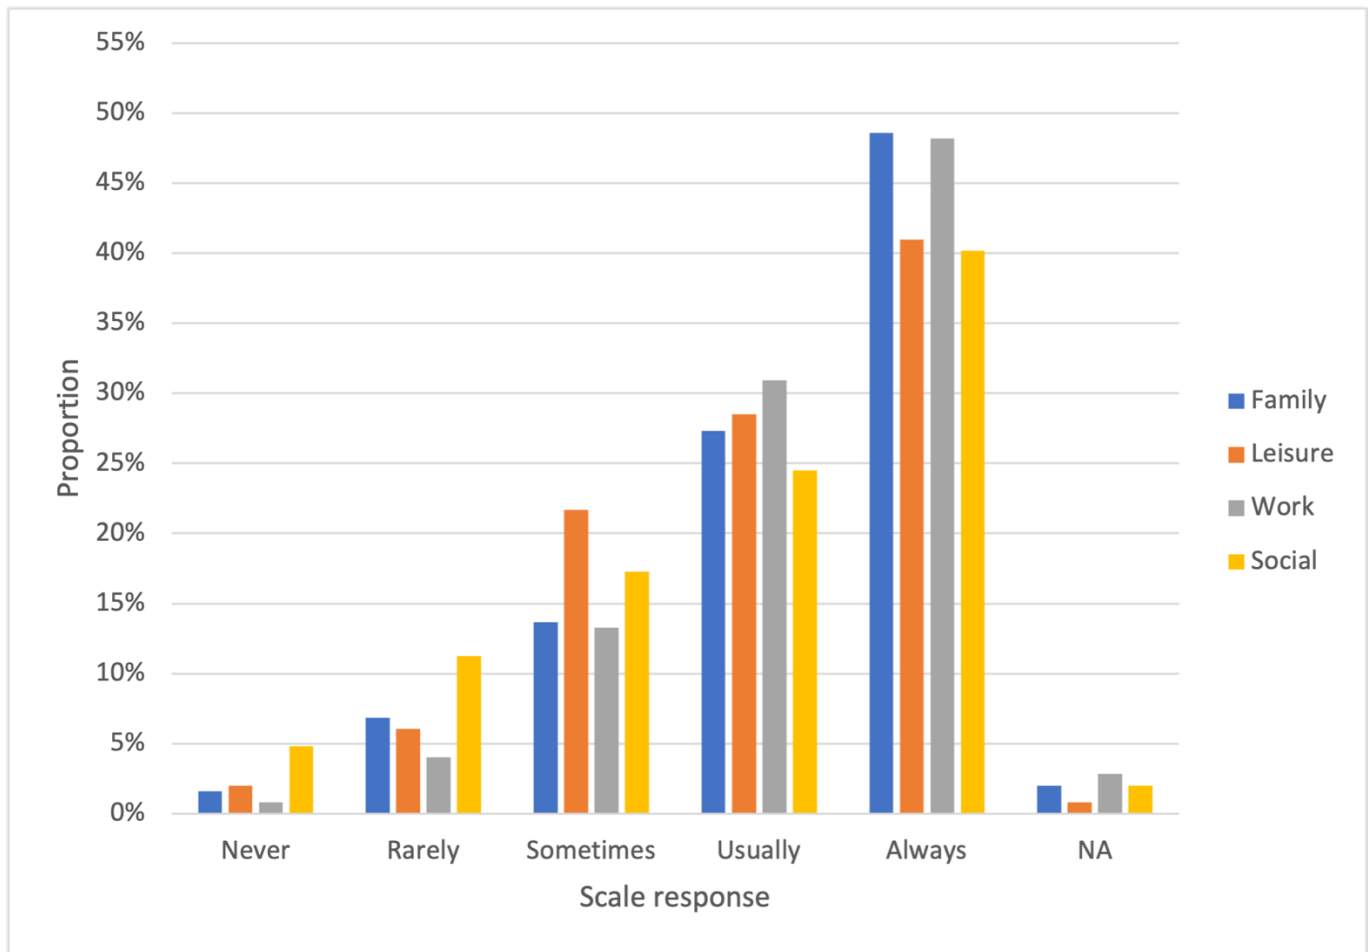

**Supplementary Figure 2. Frequency of EQ5D-5L 'usual activities' items scale responses.**

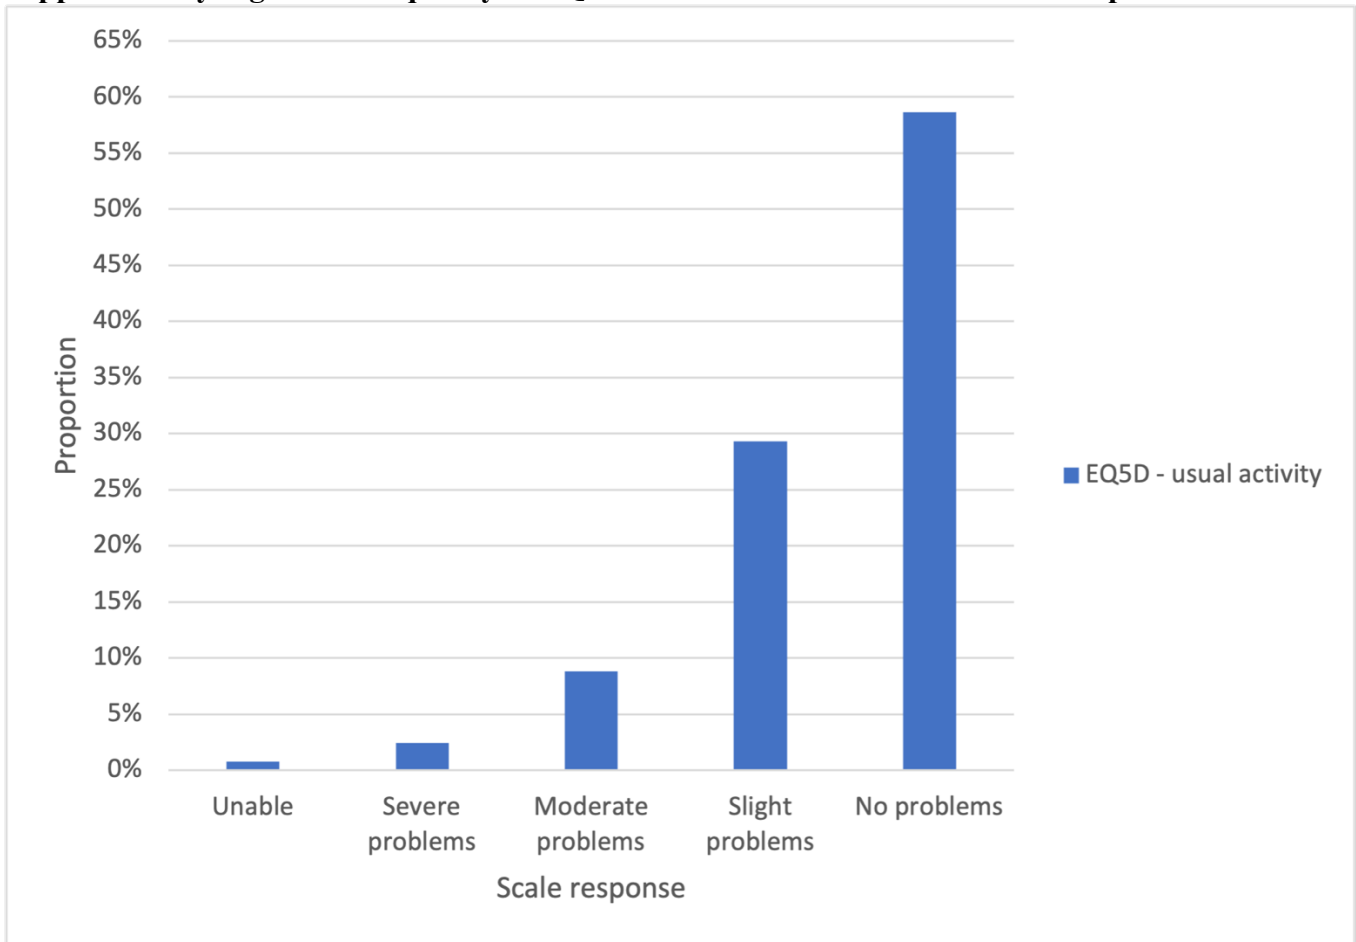

Supplement: mmc1.pdf [file mmc1.pdf]
